# Supplementary material for: Polymeric micelles using pseudo-amphiphilic block copolymers and their cellular uptake
Source: Royal Society of Chemistry journal article supplement (doi:10.1039/c0jm02519d), 2011-01-01
Supplement: c0jm02519d.pdf [file c0jm02519d.pdf]

$^1\text{H-NMR}$  (400 MHz) of the RAFT agent 3-(benzylsulfanyl thiocarbonylsulfanyl) propionic acid (a), polystyrene RAFT-ended (b), the block copolymer polystyrene-*b*-poly(methyl acrylate) RAFT-ended (c)

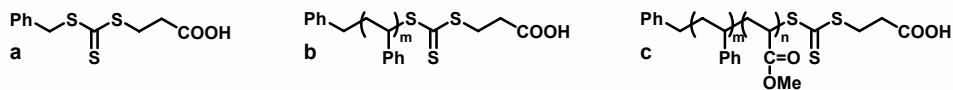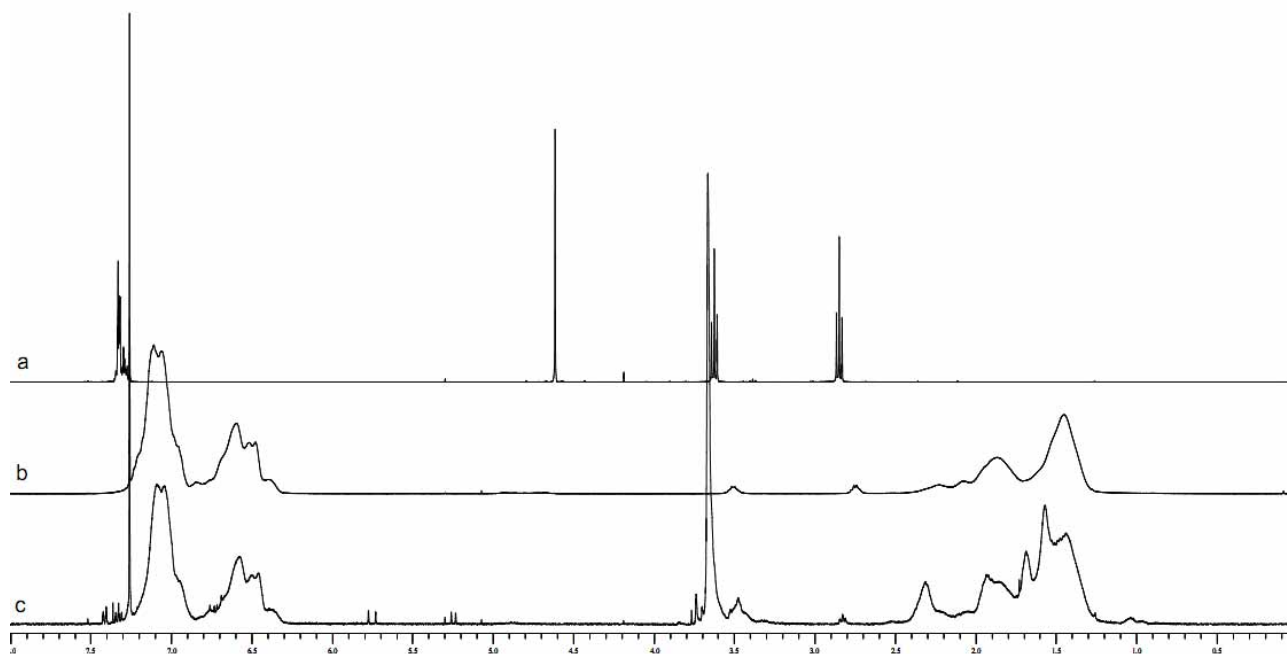

UV-Vis spectra of the RAFT agent 3-(benzylsulfanyl thiocarbonylsulfanyl) propionic acid (green line), the block copolymer polystyrene-*b*-poly(methyl acrylate) RAFT-ended (blue line) and styrene (red line)

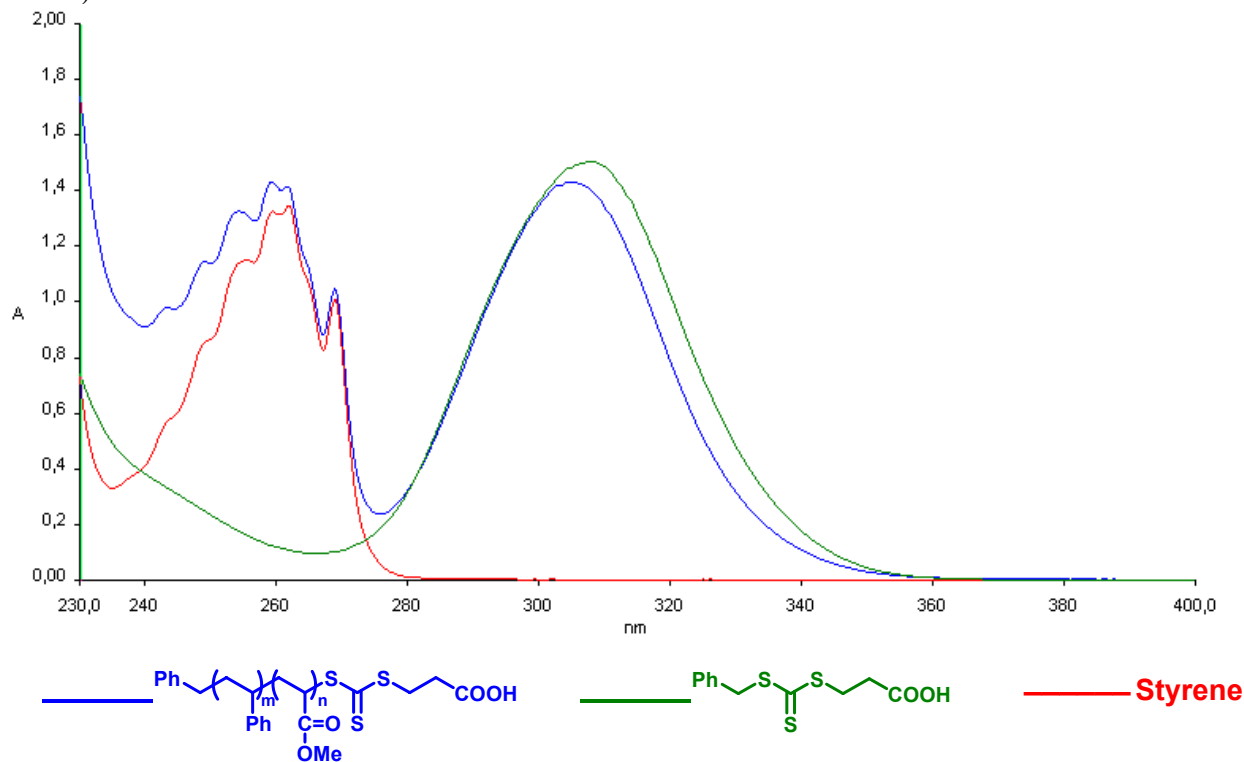

#### Polymer bound fluorescein detection

500  $\mu\text{L}$  of the aqueous suspension of micelles treated with fluorescein diacetate 5-maleimide were loaded onto Microcon Ultracel YM10 columns (MW cut 10.000 Dalton) and centrifuged at 14.000  $\times g$  for 30 min. The recovered high molecular weight fractions was washed and centrifuged 5 times with 500 $\mu\text{l}$  of acetonitrile 20%. The final amount of high molecular weight-bound fluorescein recovered from the top of the column was evaluated by using the Victor 3 fluorescence reader. Recovered fluorescence amount was obtained by interpolation with a fluorescein standard calibration curve and resulted to be 10% of the added fluorescein.
